# Supplementary material for: TiO2 nanopowder and nanofilm catalysts in the disinfection and mineralization of S. aureus with solar-simulated radiation
Source: Royal Society of Chemistry journal article supplement (doi:10.1039/d3re00540b), 2024-01-01
Supplement: d3re00540b1.pdf [file d3re00540b1.pdf]

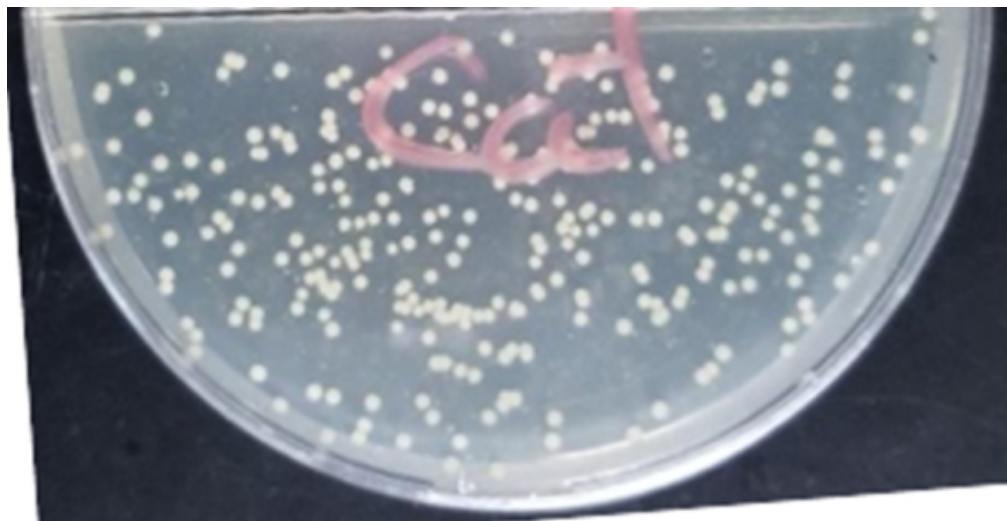

(a)

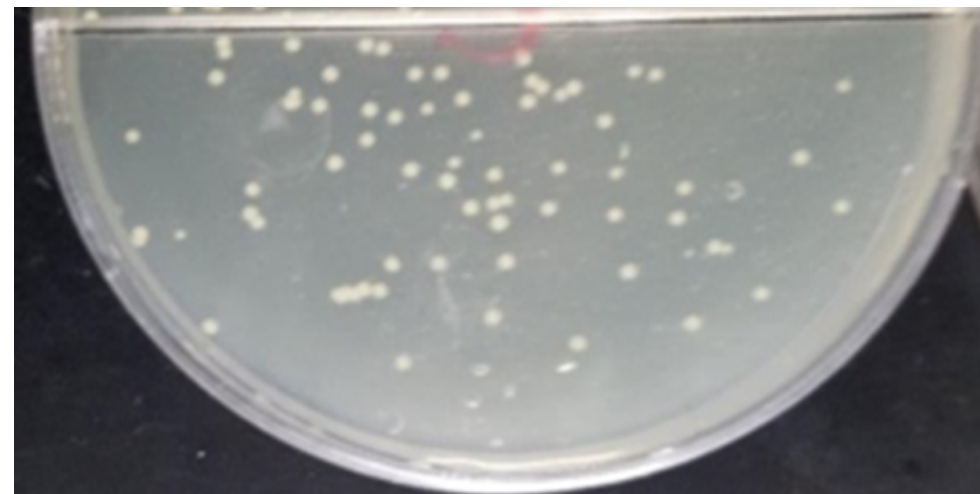

(b)

Figure (S1): Effect of photocatalytic treatment on *S. aureus* bacterial count. (a) untreated and (b) treated for 2 h.
