# Supplementary figures and images for: TiO2 nanopowder and nanofilm catalysts in the disinfection and mineralization of S. aureus with solar-simulated radiation
Source: Royal Society of Chemistry journal article supplement (doi:10.1039/d3re00540b), 2024-01-01

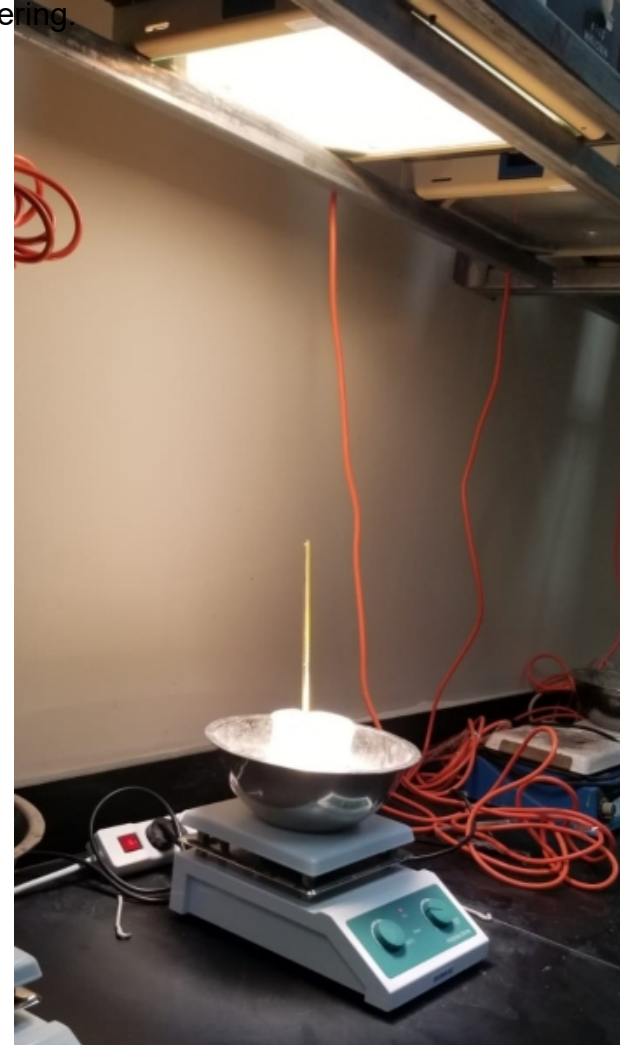

Figure S2: Set up for *S. aureus* bacterial removal by  $\text{TiO}_2$  photocatalysis

Supplement: d3re00540b2.pdf [file d3re00540b2.pdf]
